# Supplementary material for: Metagenomics of Atacama Lithobiontic Extremophile Life Unveils Highlights on Fungal Communities, Biogeochemical Cycles and Carbohydrate-Active Enzymes
Source: MDPI journal article supplement (doi:10.3390/microorganisms7120619), 2019-11-27
Supplement: s1 [file s1]

**Table S1.** Metagenomic data used in the comparison.

| Sample ID     | SRA Number | Sequencing Platform | Type of Library    | Country | Coordinates (Sampling site) | Collection Data | Reference                            |
|---------------|------------|---------------------|--------------------|---------|-----------------------------|-----------------|--------------------------------------|
| Crust 1       | SRR6651926 | Illumina HiSeq 2000 | Paired end library | Chile   | 21.21, 69.84                | June 2013       | Finstad <i>et al.</i> (2017)         |
| Crust 2       | SRR6651936 |                     |                    |         |                             |                 |                                      |
| Crust 3       | SRR6651949 |                     |                    |         |                             |                 |                                      |
| Endolithic 1  | SS2630167  | Illumina HiSeq 2000 | Paired end library | Chile   | 20.93, 70.01                | April 2013      | Crits-Christoph <i>et al.</i> (2016) |
| Hypolithic    | SRR212483  | Illumina HiSeq 2000 | Paired end library | Namibia | 23.32, 15.01                | April 2010      | Vikram <i>et al.</i> (2016)          |
| Desert soil 1 | ERR1353018 | Illumina HiSeq 2500 | Paired end library | USA     | 33.28, -116.13              | 2012            | N.R.                                 |
| Desert soil 2 | ERR1352897 | Illumina MiSeq      |                    | Spain   | 400, 37                     | 2015            |                                      |
| Desert soil 3 | ERR1352898 |                     |                    |         |                             |                 |                                      |
| Desert soil 4 | ERR1352472 | Illumina HiSeq 2500 |                    | USA     | 33.28, -116.13              | 2012            |                                      |
| Hypersaline 1 | ERR1739732 | Illumina HiSeq 4000 | Paired end library | Iran    | 34.18, 49.83                | November 2013   | Naghoni <i>et al.</i> (2017)         |
| Hypersaline 2 | ERR1739731 |                     |                    |         |                             |                 |                                      |
| Hypersaline 3 | ERR1743002 |                     |                    |         |                             |                 |                                      |
| Hypersaline 4 | ERR1739733 |                     |                    |         |                             |                 |                                      |
| Hypersaline 5 | ERR1742998 |                     |                    |         |                             |                 |                                      |

N.R.: No reference is available

## References:

- Crits-Christoph, A., Gelsinger, D.R., Ma, B., Wierzbos, J., Ravel, J., Davila, A., Casero, M.C., DiRuggiero, J. Functional interactions of archaea, bacteria and viruses in a hypersaline endolithic community. *Environ. Microb.* **2016**, 18, 2064-2077.
- Finstad, K.M., Probst, A.J., Thomas, B.C., Andersen, G.L., Demergasso, C., Echeverría, A., Amundson, R.G., Banfield, J.F. Microbial community structure and the persistence of cyanobacterial populations in salt crusts of the hyperarid Atacama Desert from genome-resolved metagenomics. *Front. Microb.* **2017**, 8, 01435.
- Naghoni, A., Emtiazi, G., Amoozegar, M.A., Cretoiu, M.S., Stal, L.J., Etemadifar Z., Fazeli, S.A., Bolhuis, H. Microbial diversity in the hypersaline Lake Meyghan, Iran. *Sci. Rep.* **2017**, 7, 11522.
- Vikram, S., Guerrero, L.D., Makhalanyane, T.P., Le, P.T., Seely, M., Cowan, D.A. Metagenomic analysis provides insights into functional capacity in a hyperarid desert soil niche community. *Environ. Microb.* **2016**, 18, 1875-1888.

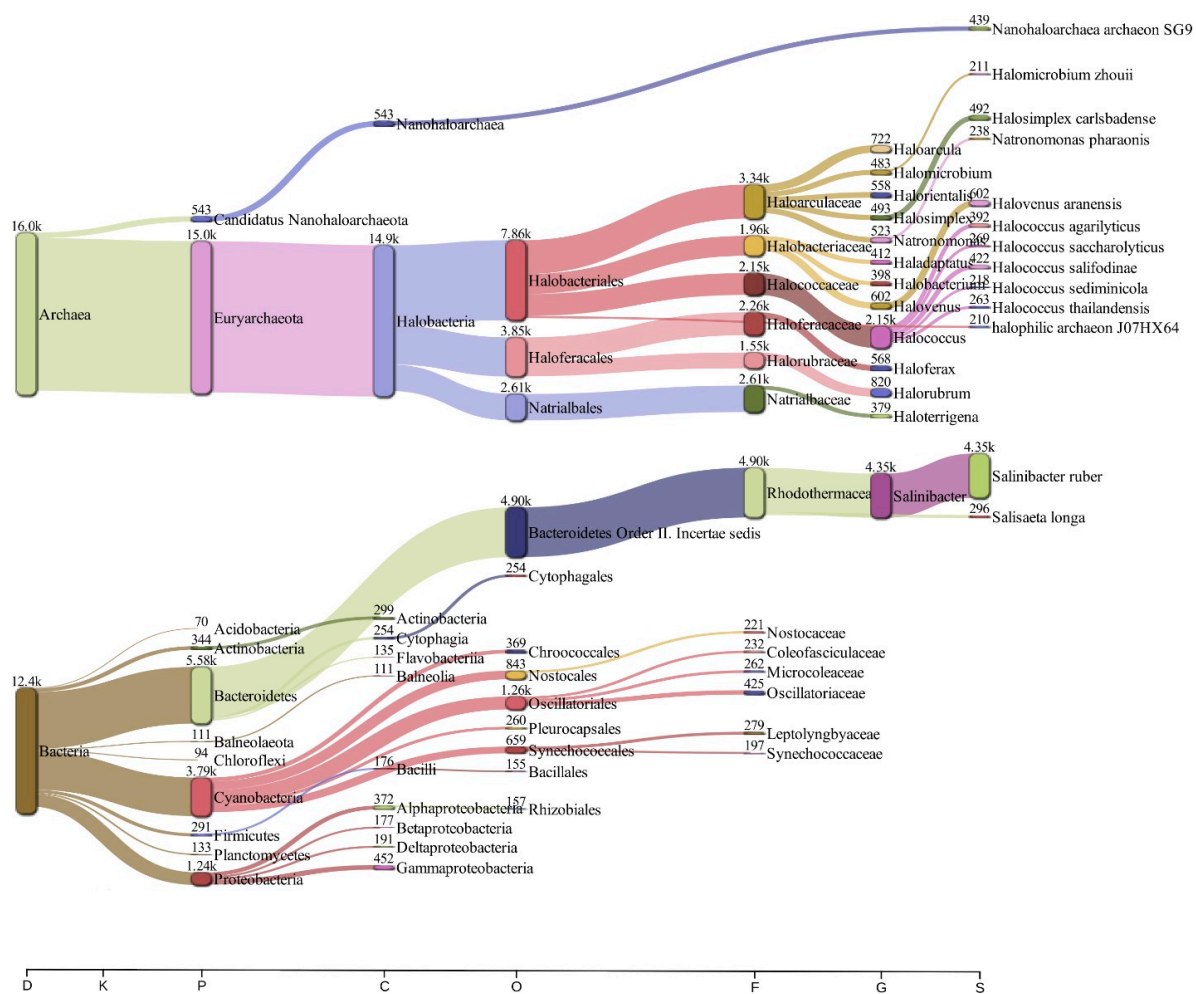

**Figure S1.** Taxonomic assignment of Archaea (upper) and Bacteria (lower) in halite metagenome. Horizontal axis: D – Domain, K – Kingdom, P – Phylum, C – Class, O – Order, F – Family, G – Genus, S – Species.

**A**

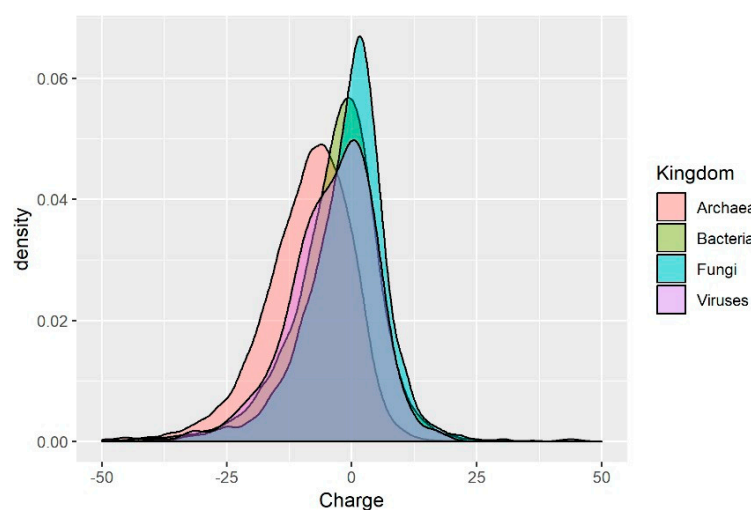

**B**

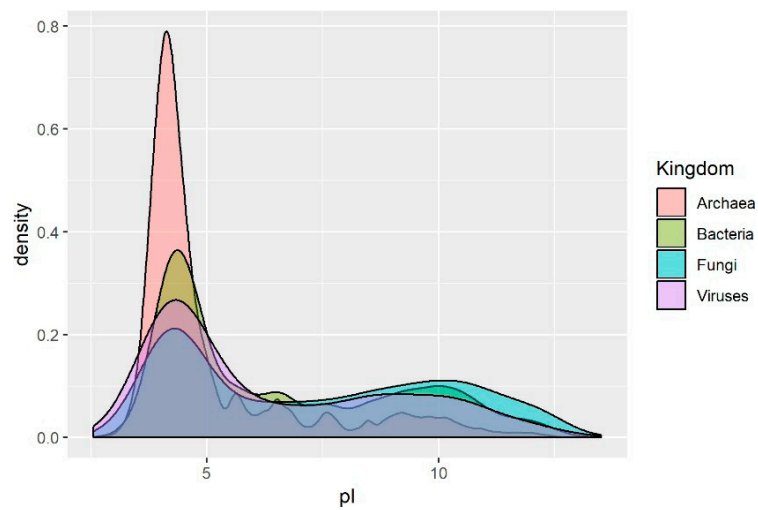

**C**

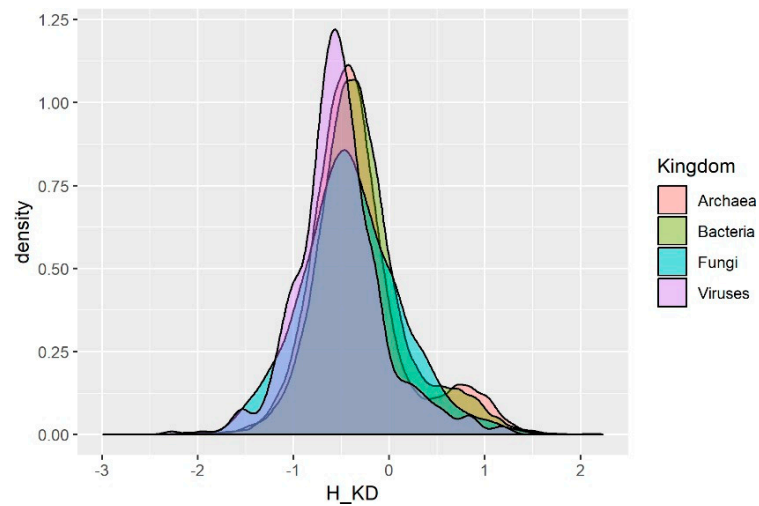

**Figure S2.** Biophysical properties of the predicted proteomes across Kingdoms in the metagenomic sequences from Atacama Desert halites. **(A)** Charge in total proteome, **(B)** pI in total proteome, **(C)** Kyte-Doolittle Hydrophobicity (H\_KD) index in total proteome.



# CARBON FIXATION IN PHOTOSYNTHETIC ORGANISMS

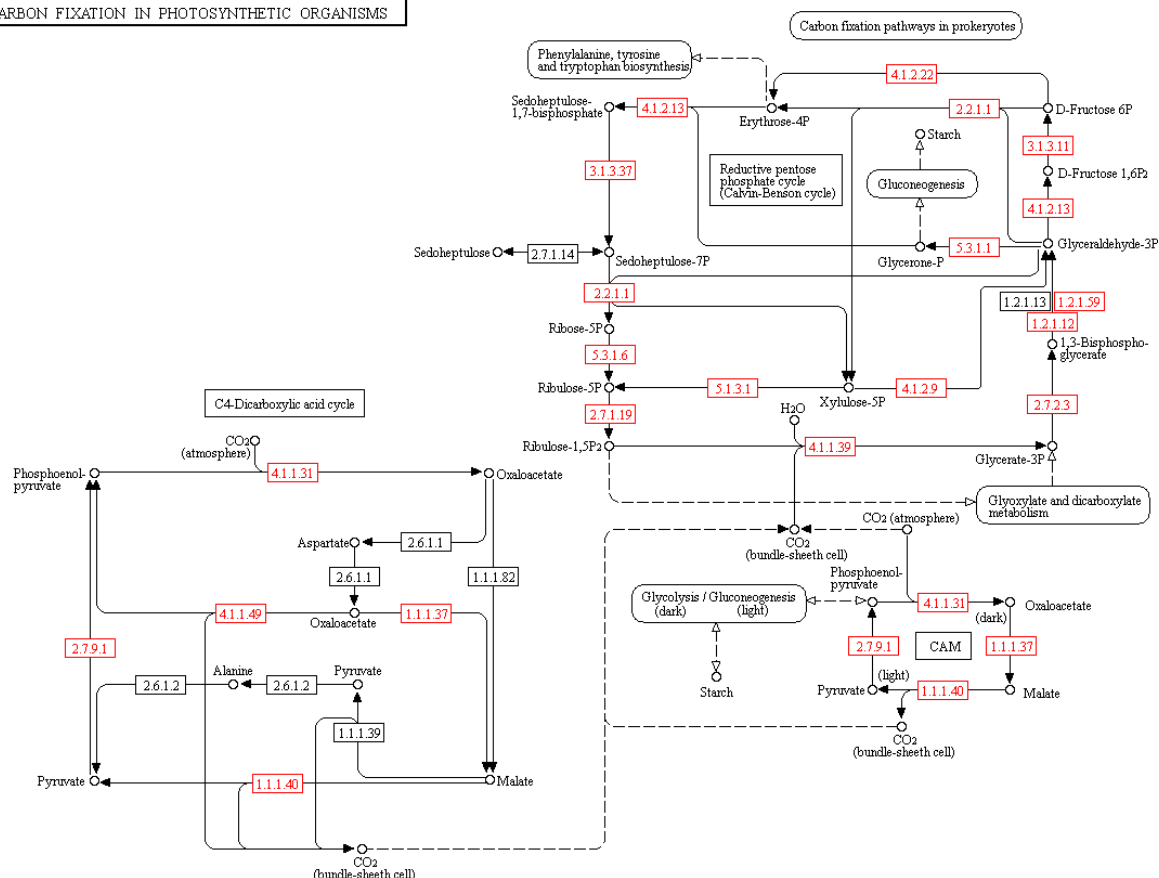

**Figure S4.** Pathway enrichment analysis related to Carbon fixation mechanisms in photosynthetic organisms. Red boxes represent enzymes found in the halite's metagenome.

[illegible]

**Figure S5.** Pathway enrichment analysis related to Carbon fixation mechanisms in prokaryotes. Red boxes represent enzymes found in the halite's metagenome.

**Figure 1: Overview of the nitrogen cycle and associated metabolic pathways.**

The diagram illustrates the flow of nitrogen compounds through various metabolic pathways, categorized by their oxidation state (from +5 to -3). Key pathways and enzymes shown include:

- Dissimilatory nitrate reduction:** Nitrate (extracellular) is reduced to Nitrite by *Nrt* (NrtABCD) and then to Nitric oxide by *Nr* (NrABCD). Nitric oxide is further reduced to Nitrous oxide by *Nr* (NrABCD) and then to Nitrogen by *Nr* (NrABCD).
- Assimilatory nitrate reduction:** Nitrate (extracellular) is reduced to Nitrite by *Nrt* (NrtABCD) and then to Ammonia by *Nr* (NrABCD).
- Denitrification:** Nitrate is reduced to Nitrite by *Nr* (NrABCD), then to Nitric oxide by *Nr* (NrABCD), and finally to Nitrogen by *Nr* (NrABCD).
- Nitrogen fixation:** Nitrogen is fixed to Ammonia by *Nif* (NifDKH, NifDKGH).
- Nitrification:** Ammonia is oxidized to Nitrite by *Nxr* (NxrAB) and then to Nitrate by *Nxr* (NxrAB).
- Anammox:** Nitrite is oxidized to Nitrate by *Nxr* (NxrAB) and then to Ammonia by *Nxr* (NxrAB).

Other metabolic pathways shown include: Carbon fixation pathways in prokaryotes, Cyanoamino acid metabolism, Methane metabolism, Glyoxylate metabolism, Arginine biosynthesis, and Glutamate metabolism.

7

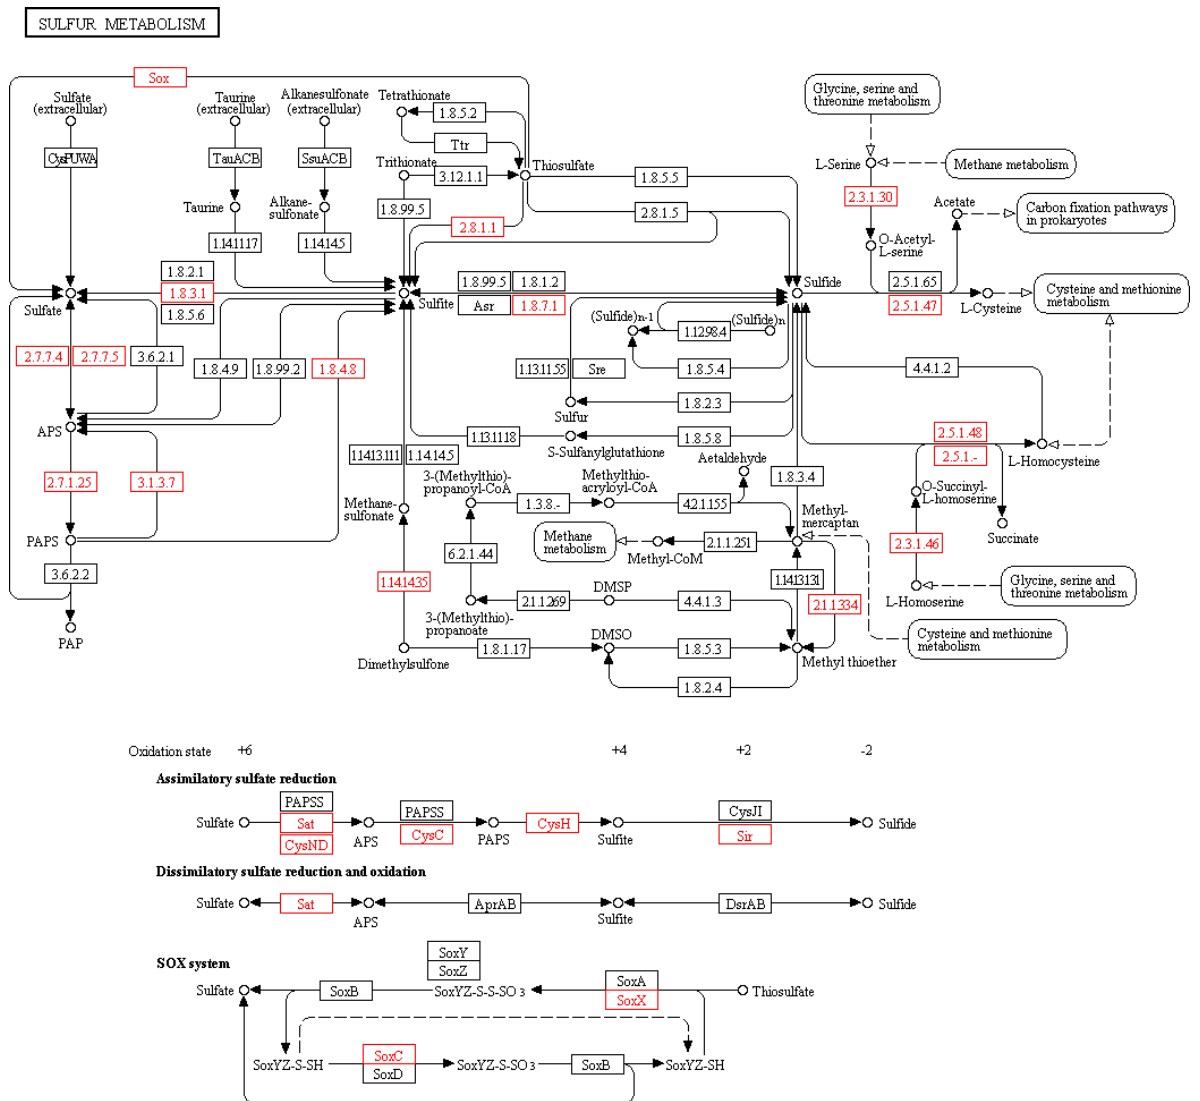

**Figure S7.** Pathway enrichment analysis related to Sulfur metabolism. Red boxes represent enzymes found in the halite's metagenome.



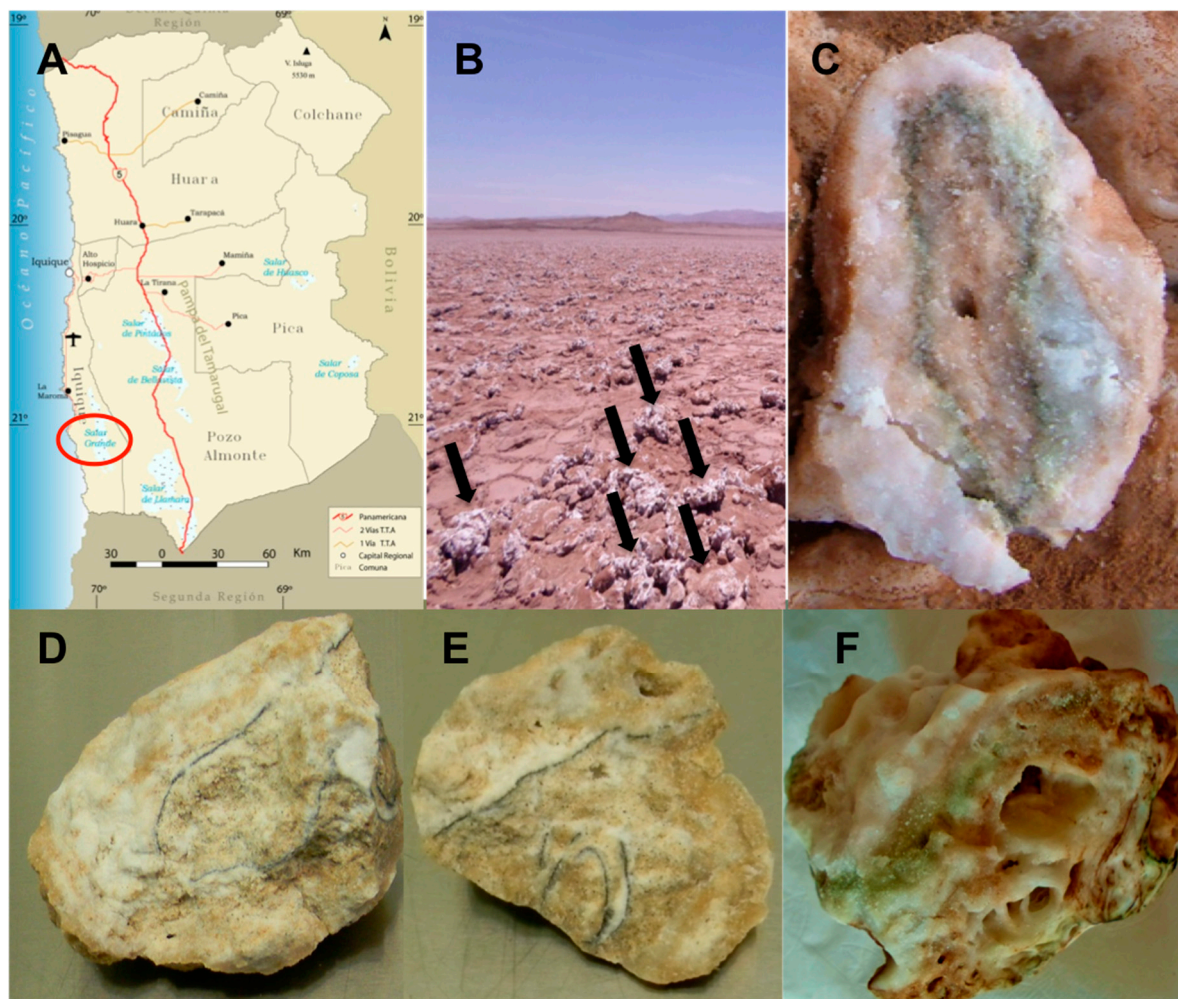

**Figure S8.** (A) Location of Salar Grande at Atacama Desert, Chile. (B) Panoramic view of halites in Salar Grande. Halites rocks are marked with black arrows. (C) Fractured halite rock. Green zone represents endolithic microbial colonization. (D, E and F) Different views of Atacama Desert halite rocks.
